# Supplementary material
Source: ML conference proceedings conference paper supplement (https://aclanthology.org/D18-1373)
Supplement: Attachment [file D18-1373.Attachment.pdf]

## A Model Learning

Figure 1 plots the RMSE and MAE scores against the number of learning iterations for LRMM on datasets. The figure confirms the conclusion from Chai and Draxler (2014) that RMSE is more stable than MAE.

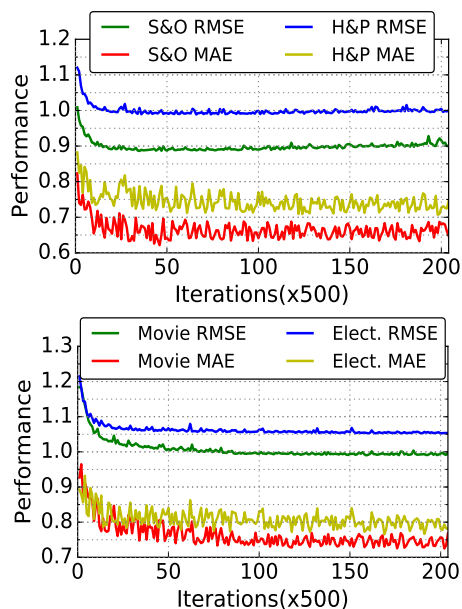

Figure 1: Changes of RMSE and MAE performance when number of iterations increases.

## B Exemplary Rating Predictions

Table 1-4 present the randomly selected rating prediction examples on the test dataset for given user-item pairs. Table 1 and 2 give examples of test dataset of “S&O” and “H&P”. The models were trained with corresponding training datasets. Table 3 and 4 give examples of test dataset of “S&O” and “H&P”. But the models were trained with “Electronics” and “Movie” datasets. cross-domain adaptation strategy is utilized. The best prediction is in **blue** and the worst prediction is in **red** and symbols present:

- **T**: ground-truth rating score for a given user-item pair.
- **+F**: prediction with all modalities user review text (**U**), item review text (**O**), item metadata (**M**) and item image (**V**).
- **-U**: prediction with dropping user review text, this leads to *user-based cold-start* problem.
- **-O**: prediction with dropping item review text, this leads to *item-based cold-start* problem.

- **-M**: prediction with dropping item metadata.
- **-V**: prediction with dropping item image.

In Table 1-4, the users and items are presented with their corresponding user and item ID directly.

## References

Tianfeng Chai and Roland R Draxler. 2014. Root mean square error (rmse) or mean absolute error (mae)?—arguments against avoiding rmse in the literature. *Geoscientific Model Development*, 7(3):1247–1250.

Table 1: Illustrative test examples of rating prediction on S&amp;O dataset.

| Item ID    | User ID               | T   | +F    | -U    | -O    | -M    | -V    |
|------------|-----------------------|-----|-------|-------|-------|-------|-------|
| B00322FPDU | A2MIVOLAN127OW        | 5.0 | 4.64  | 4.553 | 4.168 | 4.498 | 4.616 |
| B002P60ZZC | A25PA4XRMZMF0G        | 5.0 | 4.439 | 4.35  | 4.293 | 4.417 | 4.465 |
| B000K5Y1XM | AC1W570QVFE9O         | 5.0 | 4.321 | 4.31  | 4.157 | 4.272 | 4.291 |
| B001BS2C92 | A2HMG925YHACE2        | 5.0 | 3.842 | 4.28  | 3.727 | 3.809 | 3.844 |
| B0017WZQDQ | A3KRQVQAQ0BDHH        | 4.0 | 4.408 | 4.21  | 4.21  | 4.358 | 4.395 |
| B000R9ACZC | A2A26KED39175E        | 1.0 | 3.772 | 4.345 | 3.52  | 3.657 | 3.647 |
| B000NPVWPE | A33EMANJI78SGX        | 4.0 | 4.361 | 4.229 | 4.229 | 4.304 | 4.345 |
| B003K7X5AC | A1EXGL6L0QQ0M5        | 5.0 | 4.292 | 4.243 | 4.149 | 4.218 | 4.278 |
| B001949TKS | A02055972N4JENAU622IQ | 3.0 | 3.835 | 4.408 | 3.679 | 3.877 | 3.888 |
| B004LX3AXQ | A38KK0SZYEH5UD        | 5.0 | 4.639 | 4.555 | 4.288 | 4.578 | 4.6   |
| B003PVGA1O | A371HASQDGDVV0        | 5.0 | 4.474 | 4.121 | 4.121 | 4.38  | 4.444 |
| B004XUNDX4 | A3N2DZA2PXRRC         | 5.0 | 4.935 | 4.526 | 4.526 | 4.919 | 4.861 |
| B004DT6TEK | A3CD3GIXLTX3VI        | 5.0 | 4.056 | 4.433 | 3.801 | 4.01  | 4.055 |
| B0006H3N4W | A3FIG40SDEVLO0        | 4.0 | 4.266 | 4.132 | 4.351 | 4.225 | 4.317 |
| B0012RI01G | A1JZJFVE1K61LU        | 5.0 | 3.817 | 3.717 | 4.004 | 4.225 | 3.768 |
| B001F4S0Y8 | A3PZR1PPVVQC6C        | 5.0 | 3.778 | 3.665 | 4.267 | 4.225 | 3.758 |
| B00AGB1JOO | A18T5PMU5CD6U2        | 5.0 | 4.714 | 4.457 | 4.457 | 4.705 | 4.743 |
| B000O7HCK0 | A67IRSANB1NRA         | 5.0 | 4.644 | 4.455 | 4.363 | 4.535 | 4.661 |
| B0000VMX9U | AUPGEVBC9RV12         | 5.0 | 4.596 | 4.387 | 4.327 | 4.444 | 4.668 |
| B00AVUJ26C | A1H97015EH4OZO        | 5.0 | 4.699 | 4.305 | 4.305 | 4.594 | 4.616 |
| B001BR1LGI | A3SBOS17I5PNSH        | 5.0 | 3.897 | 3.818 | 4.159 | 4.594 | 3.884 |
| B000N8LCDS | A2SAKKC6L8UJAT        | 5.0 | 4.706 | 4.242 | 4.242 | 4.598 | 4.677 |
| B001MW31XS | A352L9PCDDK7NE        | 5.0 | 4.611 | 4.496 | 4.323 | 4.582 | 4.62  |
| B0028KDC82 | A2K78KQRZDQBIS        | 5.0 | 4.212 | 4.454 | 3.92  | 4.175 | 4.268 |
| B001GE19VS | A24VLSBVOTBY85        | 5.0 | 4.334 | 4.386 | 4.092 | 4.295 | 4.357 |
| B00162PQSW | A3Q5X21RROHQJY        | 5.0 | 4.355 | 4.483 | 4.074 | 4.296 | 4.358 |
| B001BR2XH4 | A1Z44EKDPMC51O        | 5.0 | 4.242 | 4.492 | 3.914 | 4.166 | 4.225 |
| B0000CG813 | A30EBGWO7F10BP        | 3.0 | 4.668 | 4.306 | 4.306 | 4.584 | 4.624 |
| B00BPIGY6  | A10IUD3B10K5HC        | 5.0 | 4.447 | 4.573 | 4.002 | 4.332 | 4.416 |
| B000TG9RCC | AB2W04NI4OEA          | 5.0 | 4.406 | 4.322 | 4.259 | 4.361 | 4.433 |
| B00004T69F | A10LVI0QQ1M7WR        | 2.0 | 3.603 | 4.227 | 3.458 | 3.488 | 3.616 |
| B001SGZ17U | A3B40LMHFP8M3U        | 5.0 | 4.692 | 4.445 | 4.382 | 4.631 | 4.708 |
| B004H9DO4Y | A1DA2DLNN6T0          | 4.0 | 4.561 | 4.347 | 4.308 | 4.452 | 4.508 |
| B000P3WPKK | A1EE1HLYUIJPIG        | 5.0 | 4.53  | 4.42  | 4.261 | 4.477 | 4.472 |
| B00278X0OQ | A3TI6V32Y7ZY14        | 5.0 | 4.225 | 4.368 | 4.026 | 4.136 | 4.192 |
| B000H6P5IE | A56RDH3IBN7MU         | 3.0 | 3.974 | 4.342 | 3.821 | 3.943 | 3.983 |
| B00BFCWA1E | A8OPMR1382E7P         | 3.0 | 3.964 | 4.388 | 3.737 | 3.874 | 3.977 |
| B00LA12PNI | A1PI8VBCXXSGC7        | 5.0 | 4.464 | 4.348 | 4.197 | 4.32  | 4.494 |
| B00005AM87 | A21CR6QBS7CAFR        | 5.0 | 4.889 | 4.523 | 4.471 | 4.839 | 4.872 |
| B004O6AHW  | A33UO20BOT6TE9        | 3.0 | 3.946 | 4.081 | 4.098 | 3.96  | 4.012 |
| B003BS2PW4 | A29U0PFLZLFS0Z        | 5.0 | 4.413 | 4.459 | 4.07  | 4.357 | 4.338 |
| B00DGAW3LA | A14ZSYKIW9VF66        | 5.0 | 4.471 | 4.373 | 4.258 | 4.394 | 4.521 |
| B001IBIQ5Q | A2MBYDJV2VGHMO        | 2.0 | 4.157 | 4.45  | 3.823 | 4.025 | 4.147 |
| B00FM9OBQS | A2WKEOZDXD9YUQ        | 5.0 | 4.243 | 4.448 | 3.944 | 4.214 | 4.284 |
| 7245456313 | A8N56ELQ4JYID         | 5.0 | 4.589 | 4.44  | 4.331 | 4.592 | 4.647 |
| B001C5ZPBG | A35C706TCG46ID        | 5.0 | 4.419 | 4.322 | 4.243 | 4.37  | 4.348 |
| B0000C51OZ | A2DJ8N25WTJHGX        | 5.0 | 4.506 | 4.413 | 4.274 | 4.463 | 4.531 |
| B000P1RO7Q | A1WWLPA4ONT88B        | 4.0 | 3.811 | 4.3   | 3.611 | 3.696 | 3.745 |
| B00C2G58U2 | A19Q4XTJXXC2ON        | 5.0 | 4.168 | 4.252 | 4.085 | 4.119 | 4.199 |
| B0015R1NE4 | A3L1RIEAPX26O2        | 4.0 | 4.223 | 4.309 | 4.051 | 4.169 | 4.227 |
| B00814XFWU | A2MKWD9PM2BE6P        | 4.0 | 4.144 | 4.468 | 4.468 | 4.1   | 4.194 |
| B007RKGAGY | AGNE7UKOB6BDZ         | 4.0 | 4.578 | 4.502 | 4.272 | 4.526 | 4.608 |
| B00591F7M6 | A3UX01P6UL6KIP        | 5.0 | 4.354 | 4.359 | 4.135 | 4.256 | 4.337 |
| B0017KYWOW | A2UHA46FEVEVJ6        | 5.0 | 4.673 | 4.403 | 4.403 | 4.587 | 4.637 |
| B000A8C5MS | AQC13YQ3J7V8E         | 5.0 | 4.467 | 4.382 | 4.217 | 4.328 | 4.45  |
| B00I0HQ4MS | AWHZOUIQ0V07M         | 5.0 | 4.752 | 4.542 | 4.374 | 4.694 | 4.781 |
| B0036N474S | ASTN4Q9E5IX9Y         | 5.0 | 4.397 | 4.469 | 4.097 | 4.318 | 4.377 |
| B000NOQ3ZQ | A22RY8N8CNDNF3A       | 5.0 | 4.626 | 4.419 | 4.329 | 4.579 | 4.669 |
| B005EMBEI6 | A2D25FRJ25M06M        | 5.0 | 4.381 | 4.334 | 4.285 | 4.343 | 4.413 |
| B0019GJZXW | ATZJNEXX7LWD3         | 4.0 | 3.668 | 4.296 | 3.534 | 3.679 | 3.759 |
| B002QEDRIO | A1SN0B1U20G786        | 5.0 | 4.437 | 4.428 | 4.169 | 4.377 | 4.42  |
| B0000C50HM | A1JJ1ZYNDNSX5P        | 5.0 | 4.56  | 4.352 | 4.352 | 4.544 | 4.574 |
| B00162RM3E | A2HG37UWGBAD9H        | 5.0 | 4.496 | 4.488 | 4.176 | 4.422 | 4.465 |
| B002E6R6B4 | A3HQBKCYJF9FHZ        | 5.0 | 4.511 | 4.279 | 4.279 | 4.405 | 4.425 |
| B002RO1E70 | AXFSJQBII1FLZW        | 5.0 | 4.755 | 4.572 | 4.426 | 4.702 | 4.764 |
| B000IXG44U | A1S4UBWYVC7FKW        | 5.0 | 4.695 | 4.503 | 4.455 | 4.7   | 4.801 |
| B00162QGLS | A1LUD1K042KCO         | 4.0 | 4.013 | 4.446 | 4.446 | 3.814 | 3.919 |
| B001UERXOQ | A171L9DKOSZ8S1        | 4.0 | 4.329 | 4.329 | 4.145 | 4.245 | 4.296 |
| B001HBHNM4 | AT3P5KJQPK8H3         | 3.0 | 4.171 | 4.232 | 4.093 | 4.102 | 4.194 |
| B000FXZV4W | A1JS5THY0EH2PS        | 5.0 | 4.332 | 4.256 | 4.202 | 4.241 | 4.341 |

Table 2: Illustrative test examples of rating prediction on H&amp;P dataset.

| Item ID    | User ID        | T   | +F           | -U           | -O           | -M           | -V           |
|------------|----------------|-----|--------------|--------------|--------------|--------------|--------------|
| B0037KMI0U | A20MMOYFA8BTNR | 5.0 | <b>4.466</b> | 4.338        | <b>3.992</b> | 4.458        | 4.391        |
| B000052XB5 | A171XR563SZDLR | 1.0 | 2.211        | <b>3.94</b>  | 3.94         | 2.09         | <b>2.055</b> |
| B00068JBIS | A2ILV6IPPW6W7I | 2.0 | 3.912        | <b>3.749</b> | <b>3.978</b> | 3.841        | 3.859        |
| B0038B3AGO | A2VK5UG43AV30U | 5.0 | 4.314        | <b>4.044</b> | 4.044        | <b>4.346</b> | 4.33         |
| B008R5W15M | A3NM1MT3Q2FHXX | 4.0 | 3.293        | <b>3.245</b> | 3.859        | <b>4.346</b> | 3.271        |
| B0058A9HLK | A1KHFO37SJWIRR | 5.0 | <b>4.678</b> | <b>4.249</b> | 4.249        | 4.64         | 4.66         |
| B001A0C7E6 | A1UM2Y9A9TCJXU | 5.0 | 4.64         | <b>4.217</b> | 4.217        | 4.724        | <b>4.746</b> |
| B00CWNMR5Y | ARTA78TP6H73D  | 5.0 | 4.64         | 4.366        | <b>4.183</b> | <b>4.678</b> | 4.672        |
| B00336EUUE | A33TRNCQK4IU07 | 3.0 | 3.496        | <b>3.318</b> | <b>4.209</b> | 3.51         | 3.589        |
| B005FTK7F4 | A28TF49GADWWR9 | 4.0 | 3.615        | <b>4.067</b> | <b>3.441</b> | 3.607        | 3.608        |
| B004H7GB9G | AJBLCBYL4V8X   | 5.0 | <b>4.928</b> | <b>4.153</b> | 4.153        | 4.853        | 4.84         |
| B007RVX9YO | A3H6H5TOAVHN30 | 5.0 | 4.416        | 4.222        | <b>4.006</b> | 4.403        | <b>4.417</b> |
| B004N8TTBQ | AR64P9P1IOZA6  | 5.0 | 4.775        | <b>4.273</b> | 4.273        | <b>4.838</b> | 4.804        |
| B00G7PCKI2 | A105S56ODHGJEK | 5.0 | <b>4.344</b> | 4.267        | <b>3.825</b> | 4.249        | 4.275        |
| B001OOLLVS | A2HS7K379UG0G5 | 5.0 | <b>4.475</b> | <b>4.161</b> | 4.161        | 4.463        | 4.474        |
| B001TLU5S6 | A168UTC2EFSGQL | 5.0 | 4.162        | <b>3.559</b> | <b>4.509</b> | 4.184        | 4.197        |
| B000668QYU | A1SAZB83QFR0W2 | 5.0 | 4.561        | 4.239        | <b>4.208</b> | 4.567        | <b>4.634</b> |
| B004L4AMIQ | A1L3XMZBKMU6QG | 3.0 | 3.858        | <b>3.698</b> | <b>4.261</b> | 3.971        | 3.956        |
| B0013OSO0K | A1UOAA1QWBFETG | 5.0 | <b>4.567</b> | 4.245        | <b>4.184</b> | 4.559        | 4.536        |
| B001RYEETQ | AT96TYI24GKXH  | 3.0 | 2.023        | 3.255        | <b>2.748</b> | 1.983        | <b>1.964</b> |
| B0058AARI2 | A309A7B0KJO88B | 3.0 | 2.878        | <b>3.443</b> | 3.443        | <b>3.086</b> | 2.87         |
| B0013OUJPS | AQLL2R1PPR46X  | 3.0 | 4.226        | <b>4.258</b> | 3.977        | <b>3.086</b> | 4.245        |
| B005ACNPLO | A2N9Y04UFXIN8B | 4.0 | 4.192        | 3.711        | <b>4.343</b> | 4.14         | <b>4.106</b> |
| B003ZYM5NI | A2CNGARED6OWWU | 1.0 | 3.53         | <b>3.495</b> | <b>3.808</b> | 3.555        | 3.498        |
| B007762NQE | A2KJ9CEH371YUN | 5.0 | 4.028        | <b>3.73</b>  | <b>4.247</b> | 4.104        | 4.048        |
| B00288UESA | ATHQP2NQRWWDA  | 5.0 | 4.768        | <b>4.106</b> | 4.106        | 4.836        | <b>4.848</b> |
| B0033WT4ZO | AX5E1Q0LNL0HG  | 4.0 | 4.388        | <b>4.408</b> | <b>3.992</b> | 4.836        | 4.405        |
| B00JZR9SE  | A537XC69FAD3J  | 5.0 | 4.912        | <b>4.351</b> | 4.351        | <b>4.929</b> | 4.919        |
| B0072DAZEE | A11OTLEDSW8ZXD | 4.0 | 3.897        | <b>3.748</b> | <b>3.985</b> | 3.891        | 3.827        |
| B007DKVI4C | A3UW0PQLDUACMH | 4.0 | 3.617        | <b>3.037</b> | 3.037        | 3.666        | <b>3.699</b> |
| B001F51VS4 | A1B05INWIDZ74O | 3.0 | <b>4.501</b> | 4.21         | <b>4.181</b> | 4.49         | 4.467        |
| B0087TNBUC | A134C9GVEU5TQE | 2.0 | 1.46         | 1.11         | <b>2.537</b> | <b>4.49</b>  | 1.422        |
| B00AW6YQVQ | A1VKAY0XWLA2CY | 2.0 | 2.718        | <b>2.238</b> | <b>4.36</b>  | 2.914        | 2.813        |
| B001G7QG72 | AX1TLM9RLP72L  | 5.0 | <b>4.683</b> | <b>4.052</b> | 4.052        | 4.68         | 4.662        |
| B0047FPM16 | A3JB405VRAERCS | 4.0 | 4.253        | <b>4.281</b> | <b>3.849</b> | 4.68         | 4.26         |
| B00DCAJ6TG | A11J1FHCK5U06J | 4.0 | 5.036        | <b>4.347</b> | 4.347        | 4.972        | <b>5.111</b> |
| B001BJHCVO | ALVYD6HBLYI0W  | 4.0 | 3.506        | <b>3.409</b> | <b>4.005</b> | 3.449        | 3.466        |
| B002YD8GBG | A22I55P15NSAOX | 5.0 | <b>4.552</b> | 4.54         | <b>3.894</b> | 4.514        | 4.498        |
| B003LBYB3M | AGX0QBT90WAC6  | 2.0 | <b>4.372</b> | 4.335        | <b>3.898</b> | 4.283        | 4.317        |
| B00CHI16K6 | A21OBYW0N5ENS7 | 4.0 | <b>4.332</b> | <b>3.877</b> | 3.877        | 4.288        | 4.315        |
| B00FZHUGVQ | A34GM17T6WTJDK | 5.0 | <b>4.063</b> | <b>3.912</b> | 3.912        | 4.018        | 4.057        |
| B00020I9II | ABTUKJSZV4STB  | 4.0 | 4.505        | <b>4.611</b> | 4.214        | <b>4.018</b> | 4.595        |
| B005QEP6TK | A1S7VZIS6VUWD7 | 5.0 | <b>4.441</b> | <b>3.92</b>  | 3.92         | 4.409        | 4.38         |
| B00185OLEW | A2APTUY7J8CN29 | 5.0 | 4.782        | <b>4.079</b> | 4.079        | <b>4.798</b> | 4.782        |
| B0077EA8DQ | A2CKI7D9CTDZYR | 4.0 | 3.3          | <b>3.027</b> | <b>4.077</b> | 3.193        | 3.269        |
| B000HA8M4E | A35SJXBGJG948J | 5.0 | <b>4.643</b> | 4.364        | <b>4.183</b> | 4.64         | 4.566        |
| B0006U6IMI | A2A38CL5LF29VX | 4.0 | 4.411        | <b>3.84</b>  | 3.84         | 4.408        | <b>4.454</b> |
| B000BNWN56 | A3TAS1AG6FMBQW | 5.0 | 4.812        | <b>4.295</b> | 4.295        | <b>4.912</b> | 4.903        |
| B000FRIWUS | AT9SMMJFVZOKW  | 5.0 | 4.851        | <b>4.34</b>  | 4.34         | 4.945        | <b>4.976</b> |
| B008KEHA2E | A25C2M3QF9G7OQ | 4.0 | 4.236        | <b>4.299</b> | <b>3.87</b>  | 4.945        | 4.245        |
| B00006L9CA | A1115ST6F5CWYP | 5.0 | 4.171        | <b>3.827</b> | <b>4.294</b> | 4.166        | 4.14         |
| B00014EWUO | A2JK2F69GDATO0 | 5.0 | 4.7          | <b>4.322</b> | 4.322        | 4.754        | <b>4.776</b> |
| B004WPJBDG | A37FFWZUGO8L7W | 4.0 | 4.375        | <b>4.083</b> | 4.083        | 4.446        | <b>4.459</b> |
| B0038NB8M0 | A1OATQG6MDSMID | 1.0 | 2.587        | <b>4.207</b> | <b>2.379</b> | 2.493        | 2.592        |
| B0085YJ4IO | AO96PLO6E3MJC  | 4.0 | <b>4.016</b> | <b>3.852</b> | 3.852        | 4.03         | 4.071        |
| B005G4YCHW | A2S1E1WRYIVT7R | 5.0 | <b>5.217</b> | <b>4.53</b>  | 4.53         | 5.313        | 5.299        |
| B000JH3MU  | A21VZDJXHITESS | 5.0 | 4.698        | 4.313        | <b>4.265</b> | <b>4.779</b> | 4.729        |
| B00HBBX4EA | AS44QEHT3KSPK  | 5.0 | <b>4.532</b> | 4.287        | <b>4.109</b> | 4.468        | 4.507        |
| B003WJD8HI | A3CG93783LP0FO | 4.0 | <b>3.975</b> | 4.05         | <b>3.79</b>  | 3.968        | 3.921        |
| B004NSUMTO | AR1T36GLLAFFX  | 4.0 | 4.36         | <b>4.404</b> | <b>3.987</b> | 3.968        | 4.323        |
| B004Y9AINC | A1WVM25ZPNU32A | 4.0 | 3.559        | <b>3.406</b> | <b>4.116</b> | 3.541        | 3.586        |
| B004U3Y9FU | A34ATWL87P8HDL | 5.0 | 4.297        | <b>4.403</b> | <b>3.845</b> | 4.332        | 4.294        |
| B00FT8ZHHE | A21ZE48YPVAE4A | 5.0 | 4.825        | <b>4.15</b>  | 4.15         | 4.897        | <b>4.913</b> |
| B000GG15YS | A1FF092PR1359L | 3.0 | 3.496        | <b>4.471</b> | <b>2.884</b> | 3.333        | 3.339        |
| B000GCED9G | A11F60W72FUBH8 | 5.0 | <b>4.471</b> | <b>3.968</b> | 3.968        | 4.382        | 4.468        |
| B000KBNPQ0 | A25QXWTEABEZ4R | 5.0 | <b>4.683</b> | <b>4.072</b> | 4.072        | 4.634        | 4.638        |
| B0014XHC6M | AM6O8240VDHZ5  | 4.0 | 2.96         | <b>2.857</b> | <b>3.726</b> | 4.634        | 3.006        |
| B0070252GI | A2AF9PR2RWX5H1 | 5.0 | 4.572        | 4.307        | <b>4.195</b> | <b>4.613</b> | 4.581        |
| B006L10EJO | AF0E5TGS52NRD  | 5.0 | 4.327        | <b>4.369</b> | <b>3.961</b> | 4.334        | 4.334        |
| B0007A2E0W | A36JO8IHKYBMMJ | 3.0 | 4.169        | <b>4.18</b>  | <b>3.903</b> | 4.001        | 4.136        |

Table 3: Illustrative test examples of rating prediction on S&O dataset in cross domain adaptation. The pre-trained model is based on Electronics dataset.

| Item ID    | User ID         | T   | +F           | -U           | -O           | -M           | -V           |
|------------|-----------------|-----|--------------|--------------|--------------|--------------|--------------|
| B0017X3EKM | ACJN23C0Y1GGU   | 3.0 | <b>4.474</b> | 4.298        | <b>4.197</b> | 4.406        | 4.39         |
| B000KDM3BG | A13SV7V95KQBXQ  | 5.0 | 4.512        | <b>4.176</b> | 4.176        | 4.606        | <b>4.61</b>  |
| B001P4FNCU | A11X5OHQLEY7L   | 5.0 | <b>5.028</b> | 4.666        | <b>4.525</b> | 5.148        | 5.097        |
| B009LOSCLM | A2FICQ6IEJFK9D  | 3.0 | 4.155        | <b>3.72</b>  | <b>4.401</b> | 4.236        | 4.13         |
| B001R67OBE | A12R3YGEHW7D8G  | 5.0 | 3.435        | <b>3.414</b> | 3.754        | <b>4.236</b> | 3.421        |
| B007TRGZ7Y | A3QQZO3PJ41GZG  | 4.0 | 3.262        | <b>4.236</b> | <b>3.144</b> | 3.365        | 3.187        |
| B000N5UV4C | A2TZD7OY7A7XUA  | 3.0 | 4.2          | <b>4.479</b> | <b>3.67</b>  | 4.241        | 4.158        |
| B006J64XBQ | A163KRCXD2S2BV  | 5.0 | 2.894        | <b>2.883</b> | <b>4.069</b> | 3.873        | 2.905        |
| B001HBNHNE | A3N2DZA2PXRRXC  | 5.0 | 4.453        | <b>4.008</b> | 4.008        | 4.467        | <b>4.474</b> |
| B002OAU30G | A2BOL8LPXCPWKV  | 4.0 | 5.211        | <b>5.215</b> | 4.602        | <b>4.467</b> | 5.13         |
| B0042FJH5S | A1FIJV02FOE0FR  | 5.0 | 4.518        | 4.511        | <b>4.105</b> | <b>4.56</b>  | 4.456        |
| B000FICBEU | A1FZAZE34727U5  | 4.0 | 4.404        | 4.301        | <b>4.174</b> | 4.434        | <b>4.455</b> |
| B0014VTRF8 | A3QKUOHGH6SUNB  | 4.0 | <b>4.488</b> | 4.364        | <b>4.1</b>   | 4.478        | 4.405        |
| B008CI7QTU | A3CCJKIO1ZIVAO  | 5.0 | <b>4.177</b> | 4.11         | <b>4.068</b> | 4.111        | 4.094        |
| B0015RDJZK | A2BYV7S1QP2YIG  | 3.0 | 4.675        | 4.374        | <b>4.214</b> | 4.681        | <b>4.752</b> |
| B001B7ZB4Q | A2872HUELOYZW8  | 3.0 | 4.088        | <b>4.214</b> | <b>3.992</b> | 4.17         | 4.137        |
| B00363WYWU | A3ASLNUBSSOOL   | 4.0 | 4.214        | <b>4.304</b> | <b>3.932</b> | 4.17         | 4.215        |
| B006082JYW | A25C2M3QF9G7OQ  | 3.0 | 3.827        | <b>4.165</b> | <b>3.737</b> | 3.784        | 3.789        |
| B001AX6MMG | A17TGD0FLF5U89  | 5.0 | 3.39         | <b>4.093</b> | <b>3.32</b>  | 3.44         | 3.322        |
| B004FOV89E | A2NLMNMG5AT2JR  | 5.0 | 4.412        | <b>4.456</b> | <b>4.057</b> | 4.332        | 4.362        |
| B00C586H3E | A13YGY4FR9XN3   | 4.0 | 4.722        | <b>4.75</b>  | <b>4.305</b> | 4.332        | 4.68         |
| B000ELSSZE | A31CCYZHA9LA0M  | 4.0 | 4.242        | <b>4.427</b> | 4.427        | <b>4.221</b> | 4.275        |
| B00CPCHBCQ | A11E9KUJDWNPD2  | 5.0 | 4.08         | <b>4.135</b> | <b>3.947</b> | 4.128        | 4.071        |
| B001T7QJ9O | A1NT4YYYVBMS2EE | 4.0 | 4.742        | <b>4.835</b> | <b>4.235</b> | 4.128        | 4.737        |
| B000FU4HTA | APTLIEGQJ7M8D   | 5.0 | <b>4.562</b> | <b>4.207</b> | 4.207        | 4.501        | 4.515        |
| B004GYIE5E | A3GG3DJH47CTZ5  | 5.0 | 4.414        | <b>4.451</b> | <b>3.963</b> | 4.366        | 4.355        |
| B000F7P292 | AYHHDGOBNKHDE   | 3.0 | 4.419        | <b>4.132</b> | 4.132        | 4.441        | <b>4.448</b> |
| B0035KW3WU | A35PG2QRIZB4TS  | 5.0 | 4.971        | 4.525        | <b>4.358</b> | 4.906        | <b>5.008</b> |
| B00C5RO28M | A34JMO83CXVDLV  | 5.0 | <b>4.456</b> | 4.369        | <b>4.099</b> | 4.419        | 4.429        |
| B0013ASG3E | A1WEDIT6PNQO12  | 5.0 | 4.492        | 4.265        | <b>4.168</b> | <b>4.588</b> | 4.428        |
| B005BJU3NE | AL8KY5MD92YE0   | 4.0 | 4.15         | <b>4.299</b> | <b>3.959</b> | 4.155        | 4.233        |
| B0007ZF4Q8 | ABKUJX7YJZ3DA   | 5.0 | 4.651        | 4.488        | <b>4.15</b>  | <b>4.654</b> | 4.578        |
| B002HOFBQU | AAWDMELHNPBL4   | 4.0 | <b>4.258</b> | <b>3.978</b> | 3.978        | 4.159        | 4.16         |
| B00069PPC8 | A1WCA4LG7UOZHF  | 3.0 | 4.65         | 4.434        | <b>4.225</b> | 4.694        | <b>4.726</b> |
| B006OU4E4S | A1BI06MVLKB3WC  | 5.0 | 4.303        | <b>4.39</b>  | <b>4.003</b> | 4.326        | 4.314        |
| B000UGYWTO | A4SYLZT0PGE96   | 5.0 | 4.497        | <b>4.271</b> | 4.271        | <b>4.549</b> | 4.407        |
| B004TDPGSU | A2PSTWYS4P4LQZ  | 3.0 | 4.148        | <b>4.038</b> | 4.038        | 4.121        | <b>4.155</b> |
| B008H7PSUA | A2LDUY2YY28NVG  | 4.0 | 4.089        | <b>4.401</b> | 4.401        | 3.883        | <b>3.971</b> |
| B00794VUJ0 | AFNYEP9UND180   | 3.0 | <b>3.572</b> | <b>4.078</b> | 4.078        | 3.585        | 3.596        |
| B00266AHQ8 | A3ENST25GT2KH   | 5.0 | 4.871        | 4.592        | <b>4.465</b> | 4.84         | <b>4.952</b> |
| B00165Q944 | AA808VC64TIWC   | 4.0 | 3.439        | <b>4.077</b> | <b>3.272</b> | 3.426        | 3.334        |
| B000BO4O5M | A1GSJN6HE8W884  | 5.0 | <b>3.783</b> | <b>4.125</b> | 4.125        | 3.83         | 3.818        |
| B00AAGLS8W | A8OHK6XIOV9HL   | 4.0 | 3.784        | <b>4.101</b> | <b>3.699</b> | 3.878        | 3.862        |
| B002I02HQU | A176Y7DNY6H2DN  | 4.0 | 3.965        | <b>3.893</b> | <b>3.993</b> | 3.906        | 3.937        |
| B0055NW8FW | AY2MBJ5FRSZAN   | 4.0 | 4.244        | <b>4.389</b> | <b>3.891</b> | 4.187        | 4.226        |
| B000M0MJU2 | ALESZTNX7XZC    | 5.0 | 4.012        | <b>4.191</b> | <b>3.976</b> | 3.989        | 4.0          |
| B004K1D9NA | A2TI79NM4NCEUI  | 4.0 | 4.525        | <b>4.564</b> | 4.193        | <b>3.989</b> | 4.5          |
| B000AQABOY | A2Q9ORIBPMCZ40  | 5.0 | 4.546        | <b>4.188</b> | 4.188        | <b>4.569</b> | 4.475        |
| B001UFU9T6 | A2HY1IGOK2MX5G  | 5.0 | <b>4.623</b> | 4.575        | <b>4.07</b>  | 4.6          | 4.561        |
| B004C94X12 | A16NBGAUIYS16   | 1.0 | 3.864        | <b>4.361</b> | <b>3.589</b> | 3.942        | 3.916        |
| B0074FI28Q | AX1XAET3GDV0P   | 5.0 | 4.727        | <b>4.414</b> | 4.414        | <b>4.868</b> | 4.734        |
| B001DCB61Q | A3DLSQMJRNDQKA  | 5.0 | 4.658        | <b>4.296</b> | 4.296        | 4.647        | <b>4.706</b> |
| B00168K3IY | A3P09N99T4VIXZ  | 5.0 | 3.938        | <b>4.151</b> | <b>3.749</b> | 3.897        | 3.907        |
| B000F7VV56 | AGDH4IDGDNPTZ   | 2.0 | 3.804        | <b>4.173</b> | <b>3.527</b> | 3.808        | 3.702        |
| B008KS4DGQ | A15KLG5DK0BZHG  | 4.0 | 4.389        | <b>4.444</b> | <b>3.945</b> | 3.808        | 4.387        |
| B004HIFS26 | A2QGCMZ0K7XMC   | 5.0 | <b>4.444</b> | <b>4.191</b> | 4.191        | 4.427        | 4.431        |
| B00100748Q | A4XA34LFWC07K   | 4.0 | <b>4.52</b>  | <b>4.055</b> | 4.055        | 4.507        | 4.511        |
| B000A8BSK8 | A2N5YHZS9HHOOL  | 3.0 | 2.909        | <b>4.045</b> | 4.045        | <b>2.982</b> | 2.962        |
| B0013E5N5E | A276Z3OL222ECU  | 4.0 | <b>4.513</b> | <b>4.147</b> | 4.147        | 4.508        | 4.499        |
| B002HSSJIS | A3G34L1Q2WWHPR  | 4.0 | 3.897        | 4.499        | <b>3.454</b> | 4.048        | <b>3.991</b> |
| B000VT2HKQ | A3MR3BPIY2YNEJ  | 5.0 | 3.712        | <b>4.158</b> | 4.158        | 3.787        | <b>3.703</b> |
| B000093ILT | A3R90LTE5PFBLO  | 4.0 | 3.788        | <b>4.145</b> | <b>3.673</b> | 3.79         | 3.701        |
| B000ASB66E | A13YSL2NNQHVSC  | 5.0 | 4.946        | 4.573        | <b>4.406</b> | 4.931        | <b>4.947</b> |
| B0030H59PG | A38DKP5LURJEIR  | 2.0 | 4.003        | <b>4.506</b> | <b>3.647</b> | 3.954        | 3.958        |
| B002E6X44C | A2T0DCJT1DSMGZ  | 3.0 | <b>4.363</b> | 4.271        | <b>4.087</b> | 4.318        | 4.284        |
| 7245456313 | APS831ZLF95PS   | 4.0 | <b>4.265</b> | <b>4.063</b> | 4.063        | 4.253        | 4.262        |
| B001BR4R6E | AFXXS6KIJ9E83   | 4.0 | <b>4.964</b> | 4.524        | <b>4.219</b> | 4.922        | 4.868        |
| B005ZEND7I | A12B0EANN581RD  | 5.0 | 3.939        | <b>3.867</b> | <b>3.984</b> | 4.922        | 3.98         |
| B002TUSK06 | A98EMXHC6883S   | 5.0 | 4.291        | <b>4.449</b> | <b>3.865</b> | 4.301        | 4.278        |

Table 4: Illustrative test examples of rating prediction on H&P dataset in cross domain adaptation. The pre-trained model is based on Movie dataset.

| Item ID     | User ID         | T   | +F           | -U           | -O           | -M           | -V           |
|-------------|-----------------|-----|--------------|--------------|--------------|--------------|--------------|
| B00ARF450E  | A1J75JJ0Q2OEJN  | 4.0 | 4.724        | <b>4.741</b> | <b>3.723</b> | 4.557        | 4.653        |
| B003XUAECI  | A20VQ9HLIW3HUO  | 4.0 | <b>4.125</b> | 4.368        | <b>3.333</b> | 4.221        | 4.159        |
| B000P9S2K6  | AL6CEWLV2JB90   | 5.0 | <b>4.371</b> | 4.227        | <b>3.474</b> | 4.308        | 4.319        |
| B002GKEK7G  | A1YDBR30Y6W22I  | 5.0 | 4.716        | 4.333        | <b>3.974</b> | <b>4.776</b> | 4.761        |
| B003UKKHB4  | A21FO8HXJECL08  | 4.0 | 4.162        | <b>4.087</b> | <b>3.585</b> | 4.194        | 4.182        |
| B000KUHF6GM | AEAIQ13BB832K   | 5.0 | <b>4.722</b> | 4.308        | <b>3.828</b> | 4.697        | 4.698        |
| B002P6CIKW  | A330NPBZJ8EMSH  | 5.0 | 4.322        | 4.098        | <b>3.631</b> | <b>4.371</b> | 4.275        |
| B000PKMA2G  | AQMDSDO10OJN5   | 3.0 | 3.848        | <b>3.929</b> | <b>3.47</b>  | 3.871        | 3.836        |
| B000QV9YXW  | A3Q5QDQMB4XCBN  | 4.0 | <b>4.911</b> | 4.398        | <b>4.054</b> | 4.904        | 4.891        |
| B001HLI6QQ  | A2RQEMHGSSS78G  | 5.0 | 3.026        | <b>2.925</b> | 3.346        | <b>4.904</b> | 2.974        |
| B008R5XS22  | A12N6NOSNG07VD  | 5.0 | 4.369        | 4.4          | <b>3.494</b> | 4.319        | <b>4.405</b> |
| B000X9P5GM  | A18B503XYGLK9T  | 3.0 | <b>4.089</b> | 4.059        | <b>3.504</b> | 4.083        | 4.077        |
| B001F51VS4  | A8KJS2P6E5DCB   | 4.0 | 4.448        | 4.431        | <b>3.481</b> | 4.461        | <b>4.349</b> |
| B00DBTQJO8  | A301B6L3TCD7WL  | 4.0 | <b>4.123</b> | 4.195        | <b>3.438</b> | 4.202        | 4.18         |
| B00122JDYU  | A94KNPWW8SL2    | 5.0 | 3.855        | <b>4.039</b> | <b>3.24</b>  | 3.797        | 3.809        |
| B001BJLGZC  | A1WYSC85NLM4Z   | 3.0 | 4.127        | <b>4.163</b> | <b>3.434</b> | 3.797        | 4.148        |
| B004FPTQCO  | A1IC75BCAGQ4IK  | 5.0 | 3.85         | <b>4.444</b> | <b>2.925</b> | 3.888        | 3.849        |
| B004CQ44WI  | ALNAXN9SFT7BB   | 5.0 | 4.482        | 4.39         | <b>3.65</b>  | <b>4.559</b> | 4.533        |
| B000BY6B3K  | A2TRMJA5NJS5TW  | 3.0 | <b>4.604</b> | 4.297        | <b>3.843</b> | 4.595        | 4.564        |
| B001IHAPI6  | A2QW4HHHC6XWH4  | 5.0 | 4.416        | 4.304        | <b>3.538</b> | 4.376        | <b>4.436</b> |
| B00008BFXL  | A9EABIKT2J4JA   | 5.0 | 4.276        | 4.072        | <b>3.696</b> | <b>4.303</b> | 4.294        |
| B007571RDK  | A10T29TL9SO25O  | 4.0 | <b>4.573</b> | 4.229        | <b>3.793</b> | 4.525        | 4.507        |
| B00940DV6W  | AC61U16AJQ8X7   | 3.0 | 4.455        | <b>4.505</b> | <b>3.625</b> | 4.525        | 4.499        |
| B001G7QJPG  | A2DH08YJYIBSB7  | 5.0 | 4.181        | 3.989        | <b>3.689</b> | 4.224        | <b>4.228</b> |
| B00361ETCK  | A1T1YSCDW0PD25  | 3.0 | 3.558        | <b>3.241</b> | <b>3.703</b> | 3.436        | 3.477        |
| B0019LPCNO  | ADU6LGFXXO4XF   | 3.0 | <b>4.327</b> | 4.198        | <b>3.65</b>  | 4.307        | 4.29         |
| B002YX0OQG  | A1NSJHH59U8EKD  | 5.0 | <b>4.063</b> | 4.013        | <b>3.536</b> | 4.012        | 4.011        |
| B0018US55G  | A3HXJITAB9QGKV  | 5.0 | 4.628        | 4.364        | <b>3.729</b> | 4.668        | <b>4.679</b> |
| B001BOISNU  | AOEUK9GPJKFGN   | 5.0 | 4.696        | 4.439        | <b>3.768</b> | <b>4.731</b> | 4.694        |
| B000270OY8  | A2ZE5Y9BV188XV  | 5.0 | <b>4.3</b>   | 4.014        | <b>3.755</b> | 4.283        | 4.293        |
| B000HF29KM  | A34AK2G3DMQ6T3  | 4.0 | 3.829        | <b>3.952</b> | <b>3.284</b> | 3.774        | 3.795        |
| B001BYBHHE  | A38G6AFVNYG9NX  | 5.0 | 4.18         | <b>4.356</b> | <b>3.283</b> | 4.255        | 4.168        |
| B008RY42HS  | A30SQ028COI38D  | 4.0 | <b>4.111</b> | 4.308        | <b>3.273</b> | 4.116        | 4.13         |
| B00DOSAN7A  | A3ATKIUM6ZZ4MU  | 4.0 | 4.148        | <b>4.048</b> | <b>3.615</b> | 4.148        | 4.159        |
| B000QS2ZFY  | A24OF9JEF18P12  | 5.0 | <b>4.142</b> | 3.85         | <b>3.677</b> | 4.061        | 4.102        |
| B009810D4S  | A20MEQGP5HGMX5  | 3.0 | 4.266        | 4.203        | <b>3.577</b> | 4.253        | <b>4.296</b> |
| B00CUG26Z4  | A2Q6WLEPFAU4PI  | 5.0 | 4.167        | <b>4.406</b> | <b>3.205</b> | 4.168        | 4.098        |
| B0013OULFQ  | A2W9I628I6SE1U  | 4.0 | 4.113        | 4.329        | <b>3.312</b> | <b>4.098</b> | 4.112        |
| B0032TNPOE  | A394HK1TR2GV9P  | 5.0 | <b>4.549</b> | <b>3.926</b> | 3.926        | 4.506        | 4.454        |
| B00940DUFY  | A13EW5BAP1LSFQ  | 4.0 | 4.073        | 4.174        | <b>3.351</b> | <b>4.012</b> | 4.02         |
| B001G7QUXW  | A16W8BRJHOVUOS  | 4.0 | <b>4.624</b> | <b>4.124</b> | 4.124        | 4.594        | 4.553        |
| B0030NWZUC  | A1DH3QDZX8Z7GO  | 3.0 | 4.114        | <b>4.203</b> | <b>3.392</b> | 4.134        | 4.149        |
| B0026HDURA  | A16DWTOM2OU4J8  | 4.0 | 4.188        | 4.211        | <b>3.453</b> | <b>4.144</b> | 4.195        |
| B00GY61I2S  | A3I38VP7ZNCCKM9 | 5.0 | <b>4.63</b>  | 4.264        | <b>3.818</b> | 4.602        | 4.547        |
| B000V72992  | A11YIHB6IW352W  | 4.0 | <b>4.762</b> | 4.261        | <b>3.875</b> | 4.719        | 4.728        |
| B0054RZS4M  | A2IDX4HG0LESW7  | 5.0 | 4.548        | 4.304        | <b>3.714</b> | <b>4.58</b>  | 4.526        |
| B000FEIOCM  | AS1KPP03BS7OG   | 1.0 | 2.292        | <b>3.286</b> | 3.286        | 2.309        | <b>2.274</b> |
| B0001KFXCO  | A1CEUAFLF24FHQ  | 5.0 | 4.113        | 3.794        | <b>3.761</b> | <b>4.164</b> | 4.12         |
| B0098QW8F2  | A24AOGQH7N9G20  | 3.0 | <b>4.313</b> | 4.136        | <b>3.619</b> | 4.254        | 4.257        |
| B000GP3FME  | ATJN4KEHJBOC8   | 4.0 | <b>4.574</b> | <b>4.361</b> | 4.361        | 4.52         | 4.444        |
| B007XVF3AQ  | A1AC1ZXX9IBCTT  | 5.0 | 4.192        | <b>4.333</b> | <b>3.353</b> | 4.185        | 4.205        |
| B0002CZYRA  | AMA9XZWT5SIRMJ  | 3.0 | 4.095        | <b>4.111</b> | <b>3.603</b> | 4.185        | 4.069        |
| B000668QYU  | A2PCJ19IEGIDAP  | 2.0 | 3.491        | <b>3.936</b> | <b>2.998</b> | 3.452        | 3.447        |
| B001G7QGCM  | A1B6TLJKZ5EX6F  | 5.0 | <b>4.277</b> | 4.161        | <b>3.556</b> | 4.252        | 4.189        |
| B000GLPPLM  | A1Z2PH9Y1E50NE  | 3.0 | 3.818        | <b>4.01</b>  | <b>3.327</b> | 3.867        | 3.81         |
| B00HKNQQTZU | A37R3P5JFNQG8S  | 4.0 | 4.109        | 4.179        | <b>3.386</b> | 4.127        | <b>4.086</b> |
| B004JOS33I  | A3M6VY2USEFFTI  | 3.0 | <b>4.409</b> | 4.279        | <b>3.514</b> | 4.398        | 4.338        |
| B000UK2VRK  | A3M174IC0VXOS2  | 4.0 | <b>4.733</b> | 4.505        | <b>3.623</b> | 4.731        | 4.727        |
| B0042M896E  | A6WHM5MMRGS4    | 4.0 | <b>4.364</b> | <b>4.071</b> | 4.071        | 4.277        | <b>4.364</b> |
| B0013OX9NC  | AEWYUPCNDV7HY   | 5.0 | 4.163        | <b>4.228</b> | <b>3.438</b> | 4.191        | 4.151        |
| B000VBNSS4  | A2R8HEMHC8E334  | 5.0 | 3.901        | 3.742        | <b>3.693</b> | 3.863        | <b>3.968</b> |
| B002NWHOXY  | AD2QRU9ZXBQZ1   | 2.0 | 4.696        | <b>4.744</b> | <b>3.742</b> | 3.863        | 4.699        |
| B000VTC3Q4  | A3M6L86GPYG0A9  | 5.0 | 4.617        | 4.165        | <b>3.947</b> | <b>4.679</b> | 4.66         |
| B00009ZY40  | A3OXHLG6DIBRW8  | 4.0 | 3.299        | <b>3.821</b> | <b>2.943</b> | 3.301        | 3.306        |
| B000H8VPNG  | A2582KMXLK2P06  | 3.0 | 3.67         | <b>3.959</b> | <b>3.197</b> | 3.633        | 3.615        |
| B0029IPMMM  | A2KW2LCO5QUWOI  | 4.0 | 4.192        | 4.185        | <b>3.485</b> | <b>4.14</b>  | 4.151        |
| B001M5AE12  | A2Z9X06PCY3U85  | 5.0 | 4.035        | <b>4.328</b> | <b>3.212</b> | 4.04         | 4.006        |
| B0002DMPEY  | A1IUEKFZUT7PDL  | 5.0 | 4.264        | 4.191        | <b>3.551</b> | 4.236        | <b>4.317</b> |
| B00BZC43G4  | A2QRXQPHDMFCQV  | 4.0 | <b>4.501</b> | 4.219        | <b>3.802</b> | 4.43         | 4.484        |
